# Supplementary material for: Comparative analysis of histologically classified oligodendrogliomas reveals characteristic molecular differences between subgroups
Source: Springer Nature journal article supplement (doi:10.1186/s12885-018-4251-7), 2018-04-10
Supplement: MOESM8 [file 15604652]

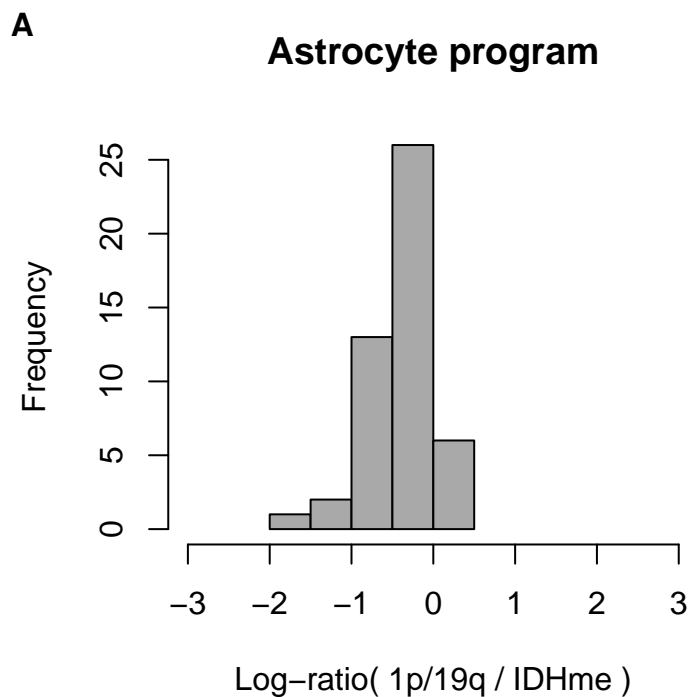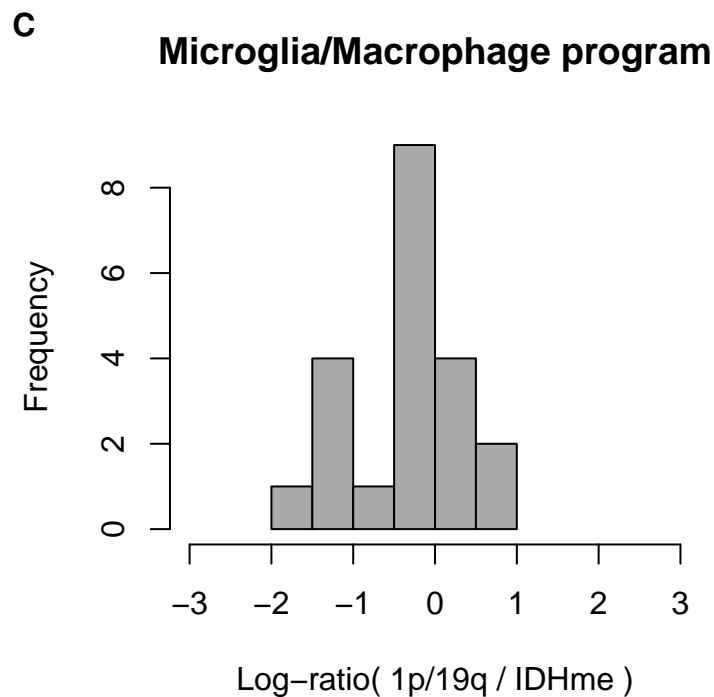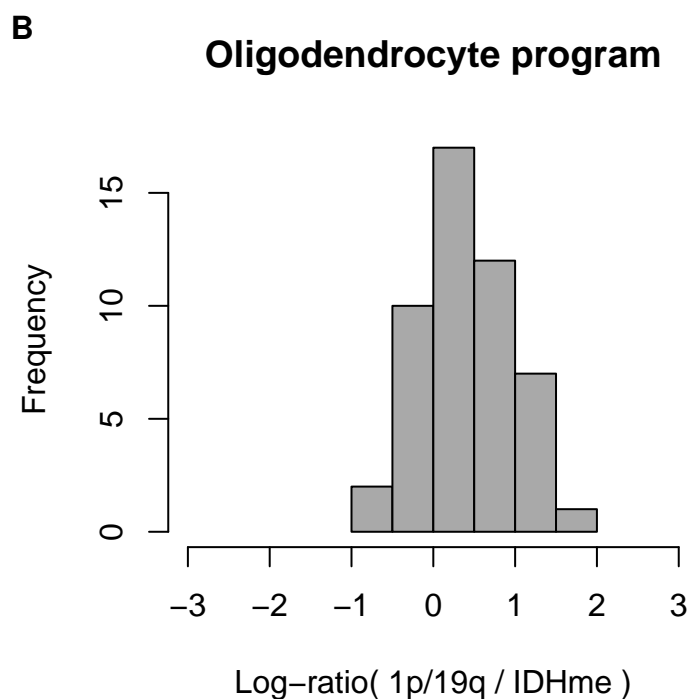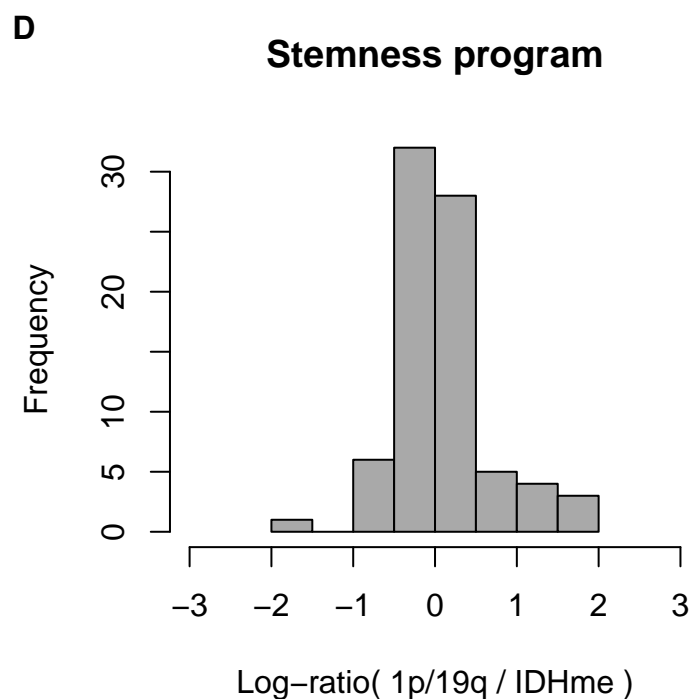

**Figure S1: Comparison of 1p/19q and IDHme to characteristic expression programs from Venteicher *et al.* (2017).** Genes included in specific expression programs were taken from Table S3 of Venteicher *et al.* (2017). We utilized these genes and determined their average  $\log_2$ -ratios for tumors of the 1p/19q subgroup vs. tumors of the IDHme subgroup and plotted corresponding histograms. **(A)** Genes of the astrocyte-like program tend to show lower expression levels in 1p/19q than in IDHme. **(B)** Genes of the oligodendrocyte-like program tend to show greater expression levels in 1p/19q compared to IDHme. Means of (A) and (B) are significantly different ( $P = 4.8e-11$ ). **(C)** Differences in the expression of microglia/macrophage markers between 1p/19q and IDHme. Mean is significantly different from zero ( $P < 0.03$ ). **(D)** Majority of genes of the stemness program do not differ in their expression between 1p/19q and IDHme, except for several strong outliers. Mean is not significantly different from zero ( $P = 0.12$ ).
